# Supplementary material
Source: PubMed Central journal article supplement (PMC3315235)
Supplement: supp_tpc.111.094672_tpc94672SupplementalRev.pdf [file supp_tpc.111.094672_tpc94672SupplementalRev.pdf]

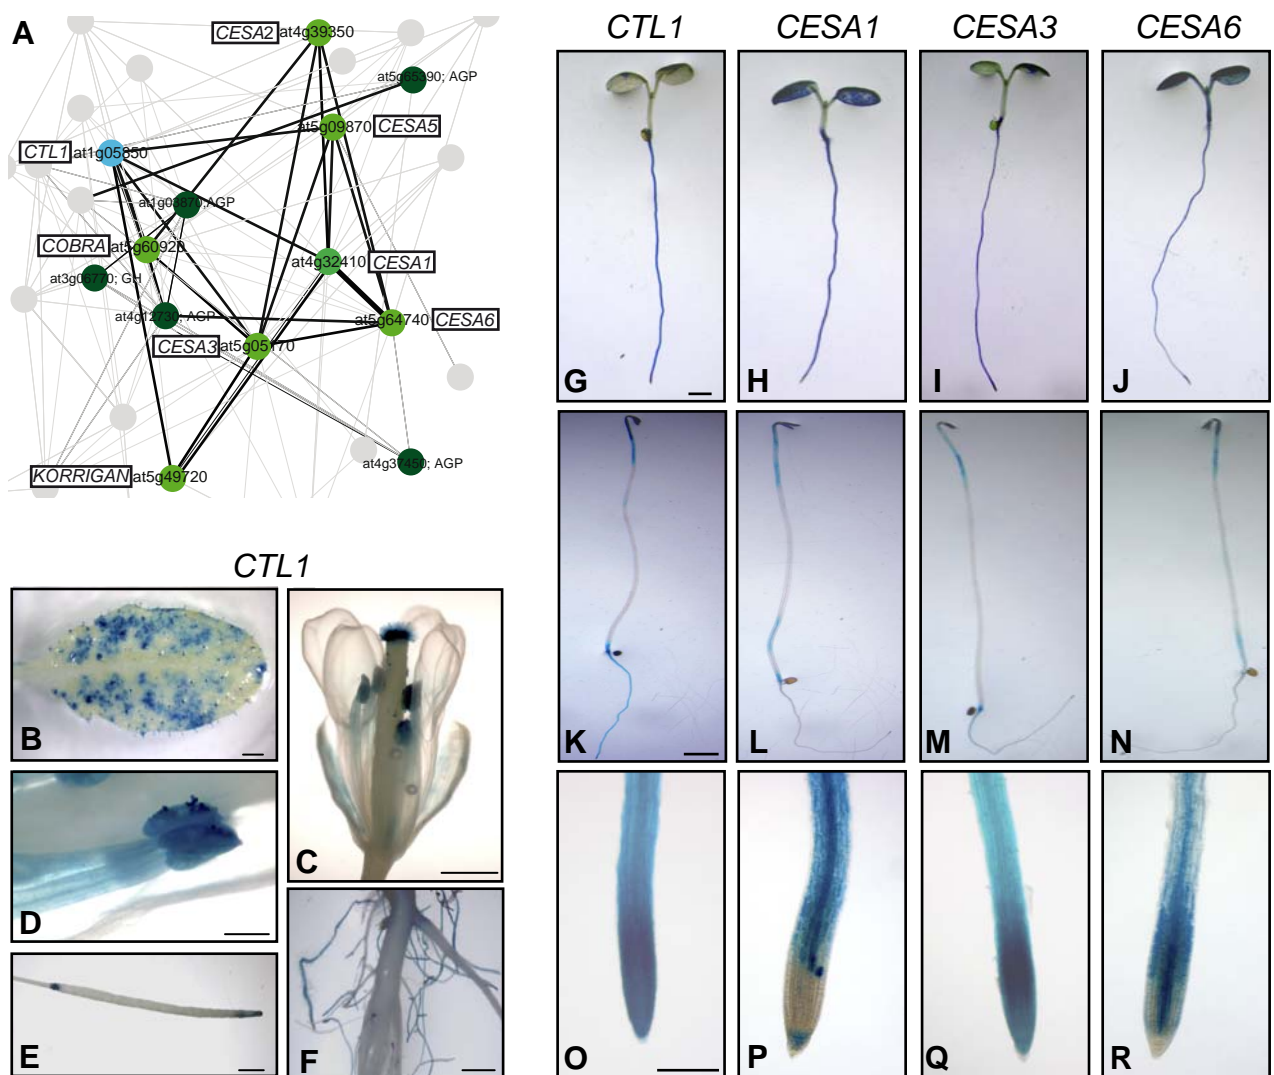

**Figure S1. Expression analyses of *CTL1*.** **A.** Co-expression network for *CTL1* generated from AraNet (aranet.mpimp-golm.mpg.de/aranet; (Mutwil et al., 2011)). Primary wall *CESA1*, 2, 3, 5 and 6 are in close vicinity to *CTL1* indicating that the genes are co-regulated. *CTL1* is shown in blue and tightly co-expressed with cell wall-related genes in green. **B to R.** *CTL1* promoter activity assessed by GUS staining. The *CTL1* promoter is active in rosette leaves (**B**), anthers, pollen and stigma (**C** and **D**), mature roots (**F**), and siliques (**E**). GUS activity was also found in seedling roots (**G**, **K**, and **O**). **G to R.** *CTL1* and the primary wall *CEsAs* are similarly expressed in seedlings. Promoter activities for *CTL1* (**G** and **K**), *CESA1* (**H** and **L**), *CESA3* (**I** and **M**) and *CESA6* (**J** and **N**) as assessed with promoter:GUS constructs in five-days-old light-grown (upper panel) and etiolated (lower panel) seedlings. **O to R.** Magnification of GUS activity in the root tips of *CTL1* (**O**), *CESA1* (**P**), *CESA3* (**Q**), and *CESA6* (**R**) in five-days-old light-grown seedlings. Scale bars: (**B**, **C**, **E**, and **F**)=1 mm; (**D**)=300  $\mu$ m; (**G**)=1 mm for (**G** to **J**); (**K**)=1 mm for (**K** to **N**); (**O**)=100  $\mu$ m for (**O** to **R**)

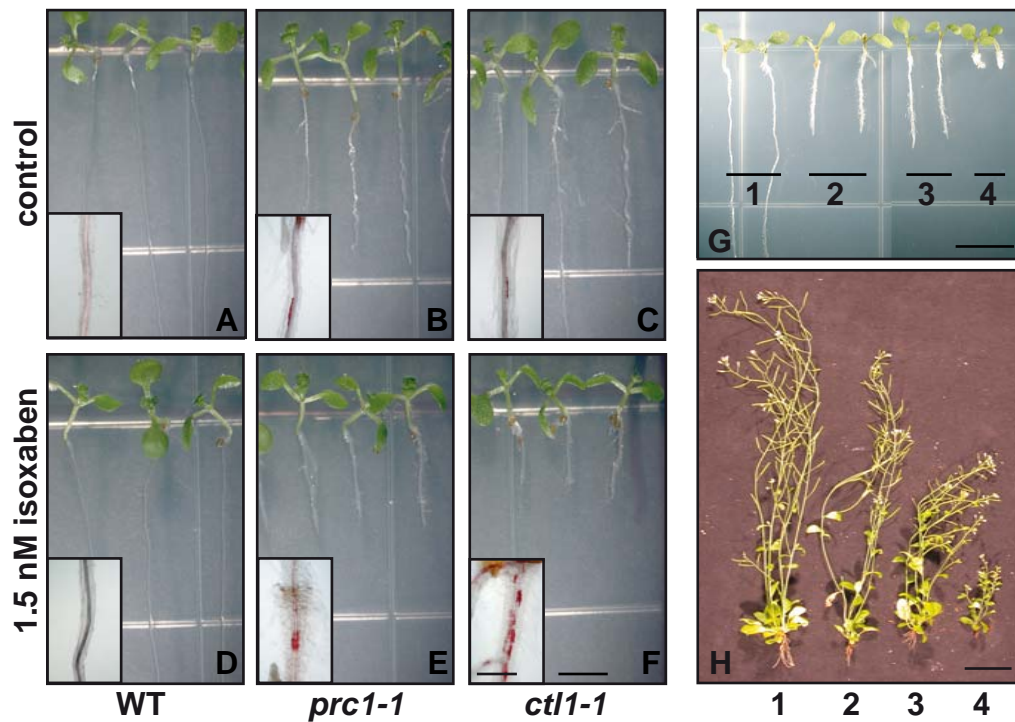

**Figure S2. Genetic interactions between *ctll-1* and *prc1-1*.** A to F. Isoxaben treatment induces lignification in the *ctll-1* mutant. Images are of phloroglucinol stained roots from five-days-old WT (A and D), *prc1-1* (B and E), and *ctll-1* (C and F) seedlings grown on control media (A to C), or on media containing 1.5 nM isoxaben (D to F). G and H. Additive growth phenotypes for *ctll-1 prc1-1* double mutants observed in six-day-old light grown seedlings (G) and in seven-week-old plants (H) 1=WT (Col-0); 2=*prc1-1*, 3=*ctll-1*, 4=*ctll-1 prc1-1*. Scale bars: (F)= 5 mm and 500 μm for the blown-up phloroglucinol staining (A to F); (G) and (H)= 5 mm.

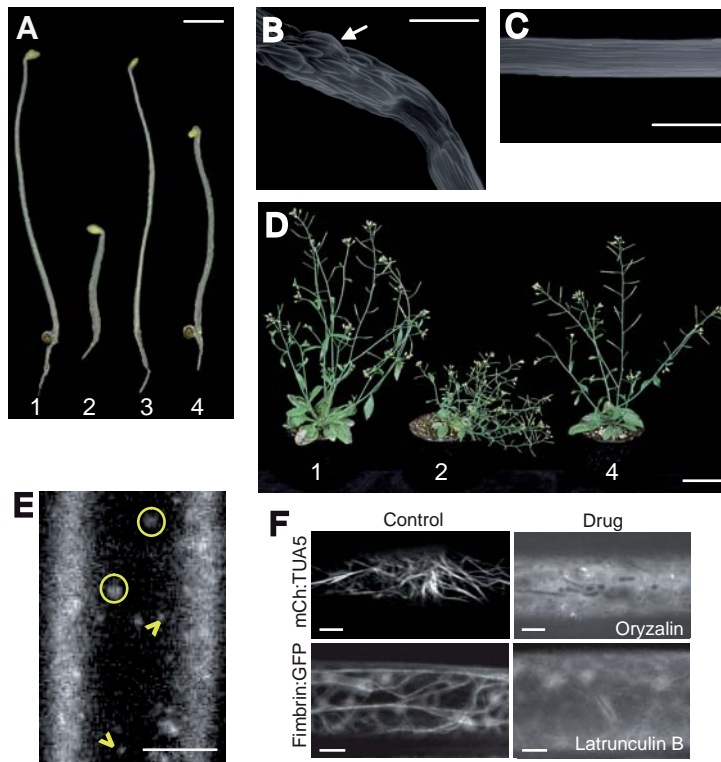

**Figure S3. *ctll-1* complementation.** **A to E.** Complemented *ctll* seedlings using a genomic clone of *CTL1*. **A.** Complementation of *ctll* with *PCTL1:CTL1* and *P35S:CTL1:GFP*. **B** and **C.** *CTL1:GFP* complementation of *ctll-1* eliminates cell swelling in five-days-old *ctll-1* etiolated hypocotyls. Environmental scanning electron microscopy (ESEM) of *ctll-1* (**B**) and *ctll-1;CTL1:GFP* (**C**). Arrow indicates swollen cell in *ctll-1* (**B**). **D.** *CTL1:GFP* rescues the *ctll-1* mutant light-grown phenotype observed in seven-weeks-old plants. 1= WT (Col-0); 2= *ctll-1*, 3= *ctll-1* complemented with *PCTL1:CTL1*, 4= *pom1-9* complemented with *P35S:CTL1:GFP*. **E.** CLSM image of a cell from a four-day-old etiolated seedling of *ctll-1* complemented with *PCTL1:CTL1:mChRFP*. The ring shaped Golgi bodies are surrounded by a yellow circle and a CTL1v is marked by a yellow arrowhead. **F.** Average projected z-stacks showing cytoskeleton fibers distribution in control marker lines for microtubules, (mChRFP:TUA5) and actin filaments (Fimbrin:GFP) after incubation in cytoskeleton destabilizing drugs, 20  $\mu$ M Oryzalin (Ory) 16 h, and 1  $\mu$ M Latrunculin B (LatB) 3 h, respectively. Scale bars: (**A**)=1 mm; (**B** and **C**)=4  $\mu$ m; (**D**)=5 cm; (**E** to **G**)=5  $\mu$ m.

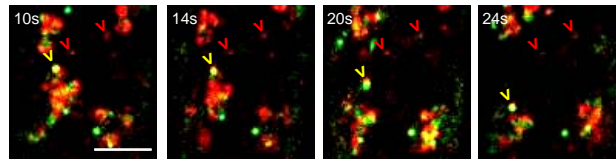

**Figure S4. CTL1 co-localizes with oryzalin-insensitive MASCs/SmaCCs in secretory vesicles.** Seedling expressing CTL1:GFP and tdT:CESA6 was imaged after 16 h treatment with 20  $\mu$ M oryzalin. Immobile MASCs/SmaCCs are indicated by red arrowheads. Oryzalin-insensitive motile vesicle containing CTL1:GFP and tdT:CESA6 is indicated by a yellow arrowhead. Scale bar: 5  $\mu$ m.

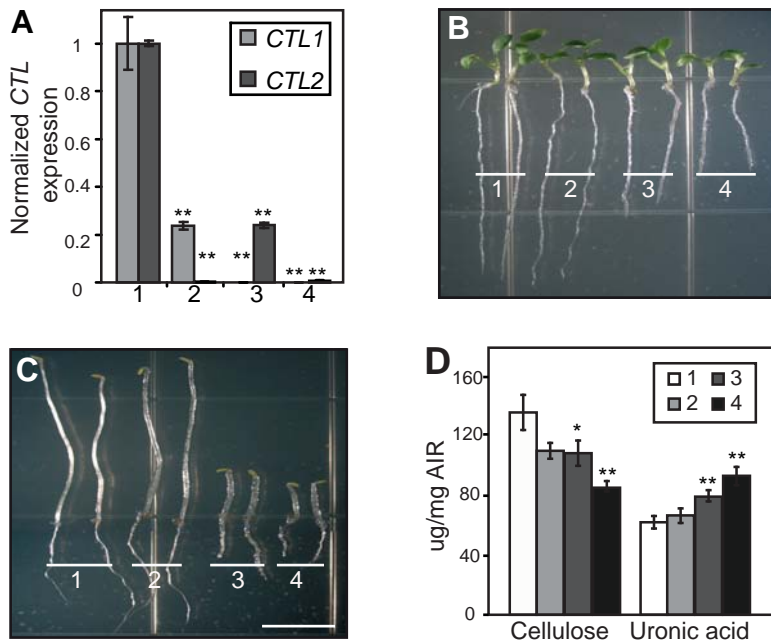

**Figure S5. *ctl1 ctl2* double mutant displays subtle additive phenotypes.** **A.** Relative quantification of *CTL1* and *CTL2* levels in 7-week old stems. Values are represented as *n*-fold *CTL* cDNA levels compared to WT. Data represents the average ( $\pm$ SE) of N=3 biological replicates, each with three technical repetitions. **B** and **C.** *ctl1 ctl2* double mutants display subtle additive phenotypes compared to the parental lines. Five-day-old light-grown (**B**) and etiolated seedlings (**C**). **D.** Cellulose and uronic acid content ( $\mu\text{g}/\text{mg}$  AIR (alcohol insoluble residue)) in seven-week-old stems of WT (Col-0), *ctl1-1*, *ctl2-1* and *ctl1-1ctl2-1* double mutants. (Student's-t test;  $P < 0.05$  (\*) and  $P < 0.01$  (\*\*)) 1=WT (Col-0); 2= *ctl1-1*, 3= *ctl1-1ctl2-1*. Scale bars: (**B**) and (**C**)=5 mm.

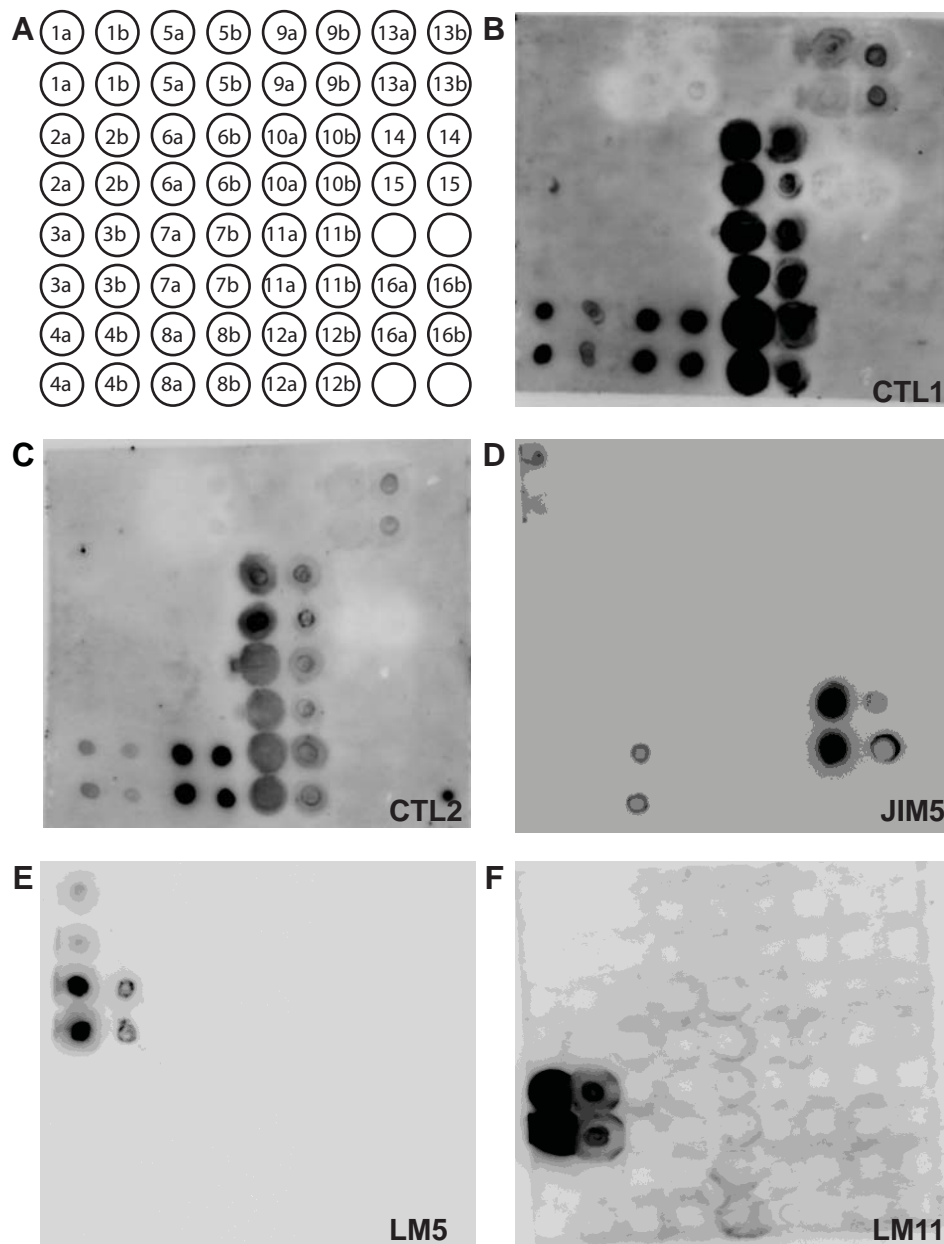

**Figure S6. Carbohydrate microarray.** A spotting grid for carbohydrate solutions and controls. Numbers indicate individual carbohydrates: pectin esterified form citrus (1), soybean rhamnogalacturonan (2), xylan from birchwood (3), xyloglucan (4), 4 M KOH fraction plant CW (5), lichenan (6), chitosan medium MW (7), chitin from crab shells (8), CM-cellulose (9), cellulose fibrous long (10), sigmacell® cellulose type 20 (11), avicel PH-101 (12), insoluble fraction plant CW (13), PBS (14), Cadoxen (15), pectin from apple (16), letters indicate concentrations of the spotting solution used: 0.5 mg/ml (a) and 0.1 mg/ml (b). **B to F.** developed microarrays after incubation with CTL1 incubation (**B**), CTL2 (**C**), JIM5 (**D**; anti-pectin), LM5 (**E**; anti-galactan) and LM11 (**F**; anti-xylan) and respective peroxidase-coupled secondary antibody (see method section)

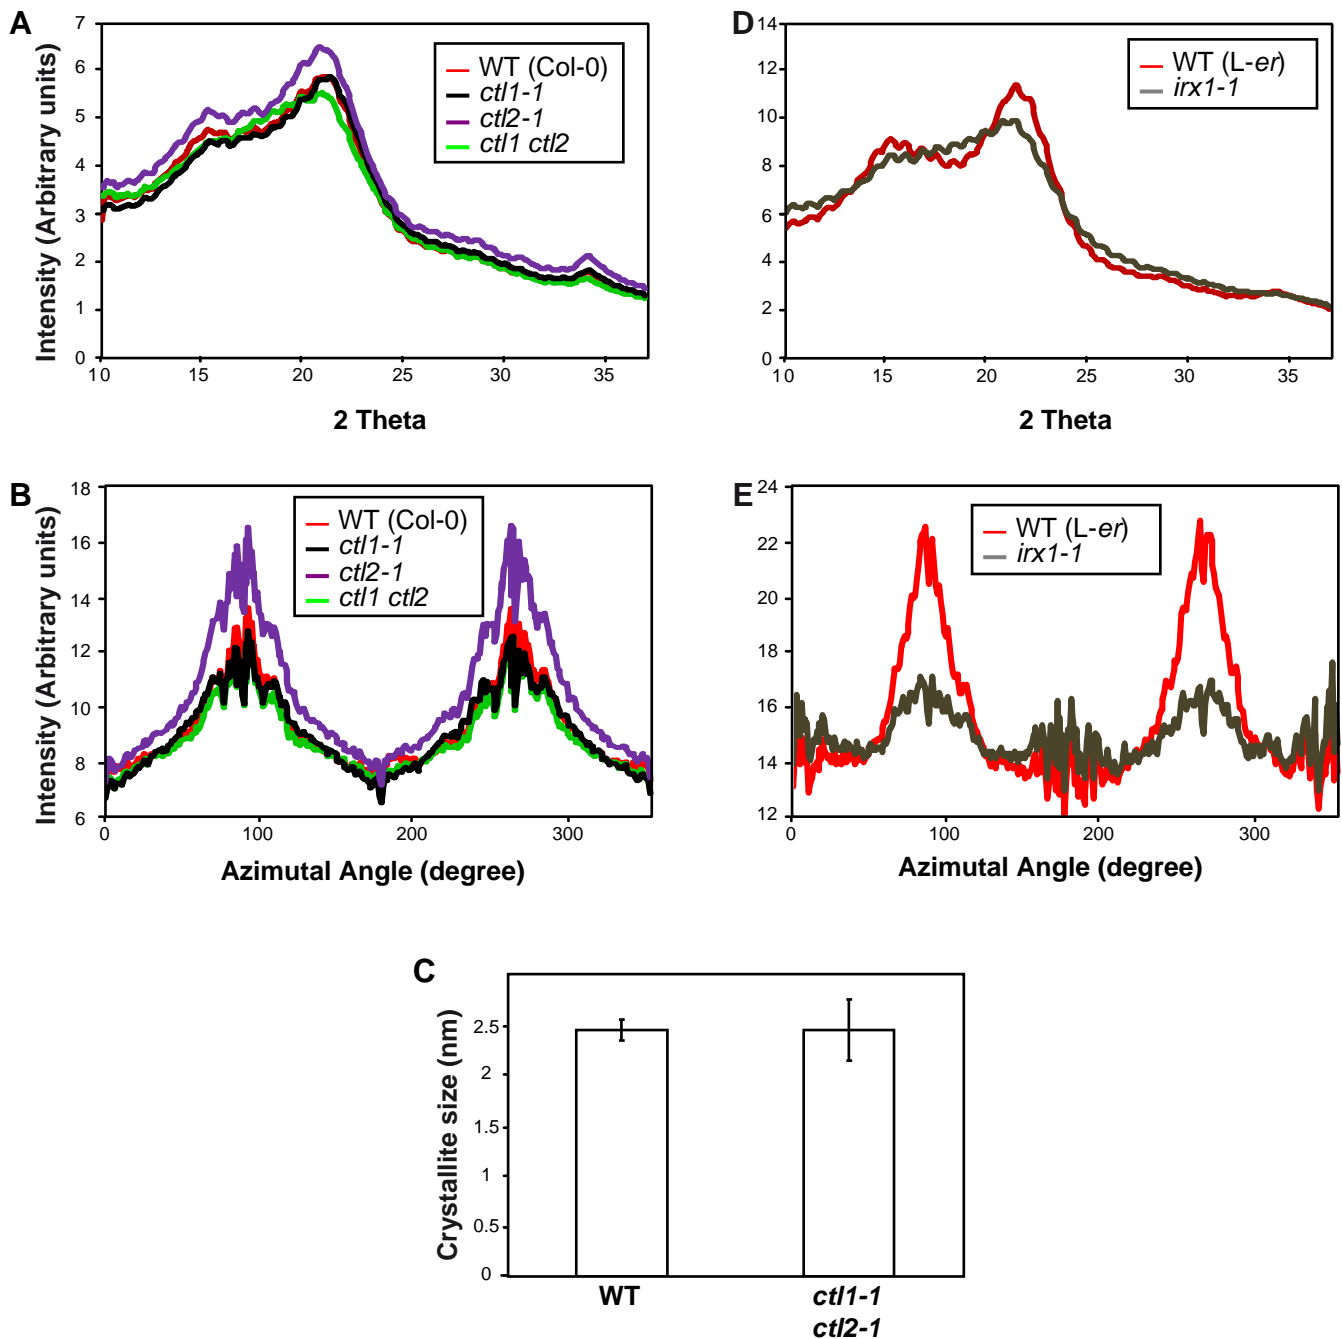

**Figure S7. X-ray diffraction analysis of seven-week-old stems of WT plants, *ctl* and *irx1* mutants.** **A** and **D**. Averaged radial profiles from X-ray diffraction. **B** and **E**. Averaged azimuthal integration of the reflection assigned to the 200 plane. **C**. Calculations on crystallite size were made assuming rod shaped crystals. In (**A**), (**B**), (**D**) and (**E**) data represents the average of N= 5 biological replicates with two points measured on each sample. WT (red), *ctl1-1* (yellow), *ctl2-1* (purple), *ctl1 ctl2* double mutant (green), and *irx1-1* (grey). In (**C**) data represents the average ( $\pm$  SE) of N= 5 biological replicates. No statistically significant differences were observed between the samples.

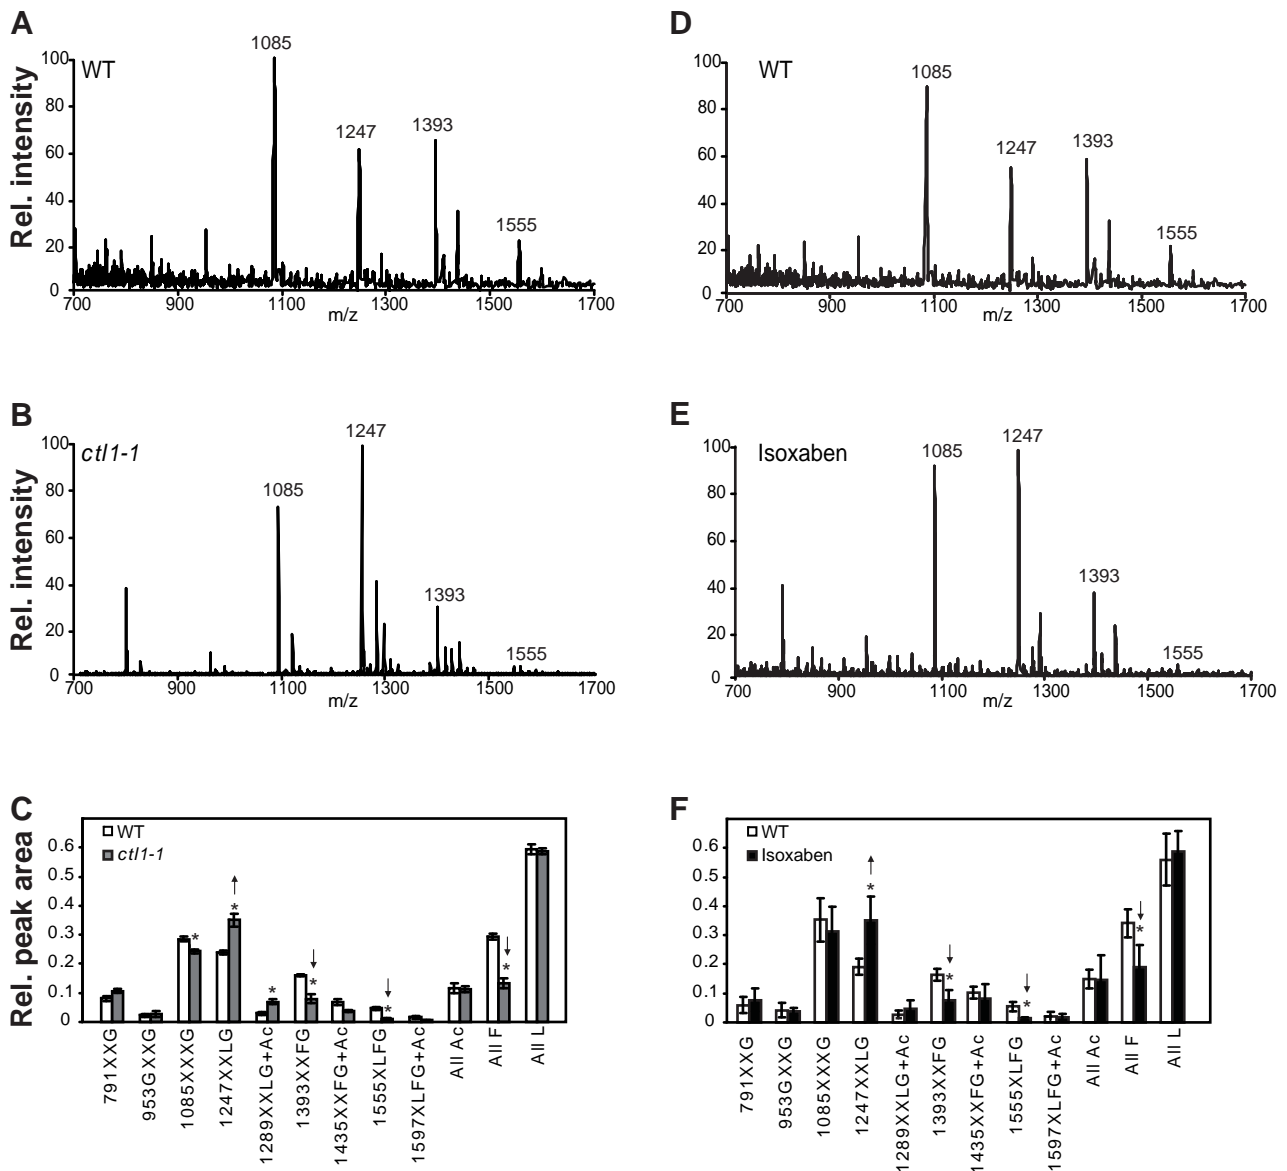

**Figure S8. Oligosaccharide Mass Profiling (OLIMP) analyses of *ctl1-1* and isoxaben grown seedlings.** **A, B, D** and **E**. MALDI-TOF mass spectra of crude cell wall fractions from six-days-old dark grown seedlings treated with a xyloglucanendohydrolase for WT (**A** and **D**), *ctl1-1* (**B**), and isoxaben treated WT (**D**). **C** and **F**. Comparative OLIMP analysis of the relative peak intensities for crude cell wall fractions from six-days-old etiolated seedlings of WT (white bars) and *ctl1-1* mutant (grey bars) (**C**) or control WT (white bars) and isoxaben grown WT (black bars) (**F**). Data represents the average ( $\pm$  SD) of N=3 biological replicates. Asterisk indicates significant changes in relative peak intensities (Student's-t test;  $P < 0.05$ ). The corresponding mass-to-charge ratios and oligosaccharide fragments are indicated below the bars: G; glucan backbone, X; xylosylatedxyloglucan branch, L; galactosylatedxyloglucan branch, F; Fucosylatedxyloglucan branch, Ac; Acetylated xyloglucan branch.



**Table S1. Identification of CTL-like homologs that are co-expressed with primary and secondary *CESA* genes in other plant species using PlanNet (<http://aranet.mpimp-golm.mpg.de> (Mutwil et al., 2011)) and BLAST (<http://blast.ncbi.nlm.nih.gov/Blast.cgi>)**

| PFAM family    | Description                                  | Arabidopsis | Brachypodium                                                  | Barley                                                       | Medicago                                                                                                                   | Poplar                                                                   | Rice                                                                                                           | Soybean                                                                      | Wheat                                                                                       |                                                                                                                                   |
|----------------|----------------------------------------------|-------------|---------------------------------------------------------------|--------------------------------------------------------------|----------------------------------------------------------------------------------------------------------------------------|--------------------------------------------------------------------------|----------------------------------------------------------------------------------------------------------------|------------------------------------------------------------------------------|---------------------------------------------------------------------------------------------|-----------------------------------------------------------------------------------------------------------------------------------|
| Cellulose synt | Cellulose synthase catalytic subunits (CESA) | 1CW         | at4g39350<br>at4g32410<br>at5g05170<br>at5g64740<br>at5g09870 | Bradi1g02510<br>Bradi2g34240<br>Bradi1g53210<br>Bradi1g54250 | bab67900.1<br>aam26299.1<br>aaf89966.1<br>aaf89963.1<br>aaf89963.1<br>aaf89961.1<br>aak27814.1<br>aal38530.1<br>aaf89964.1 | Medtr3g136720.1<br>Medtr7g099810.1                                       | jgilpoptr1_1 827510 <br>estext_fgenes4_pg_c_870007<br>jgilpoptr1_1 835809 e<br>stext_fgenes4_pm_c_lg_xviii0125 | LOC_Os03g62090.1<br>LOC_Os07g14850.1<br>LOC_Os07g10770.1<br>LOC_Os05g08370.1 | Glyma02g08920.1<br>Glyma16g28080.1<br>Glyma06g07320.2<br>Glyma05g32100.1<br>Glyma04g07220.1 | UniRef90_A2Y0X2<br>UniRef90_A2Y0X2<br>UniRef90_Q69V23<br>UniRef90_B1P2T4<br>UniRef90_A2Y0X2<br>UniRef90_A2Y0X2<br>UniRef90_Q84ZN6 |
|                |                                              | 2CW         | at5g44030<br>at5g17420<br>at4g18780                           | Bradi4g30540<br>Bradi1g25120<br>Bradi2g49910<br>Bradi3g28350 | bab67900.1<br>aam26299.1<br>aaf89963.1<br>aaf89963.1<br>aak27814.1<br>aaf89964.1                                           | Medtr8g145000.1<br>Medtr8g145000.2<br>Medtr4g089980.1<br>Medtr4g089800.1 | jgilpoptr1_1 555650 <br>eugene3.00040363<br>jgilpoptr1_1 553321 <br>eugene3.00002636                           | LOC_Os01g54620.1<br>LOC_Os09g25490.1<br>LOC_Os10g32980.1                     | Glyma02g36720.1<br>Glyma06g06870.1<br>Glyma09g05630.1<br>Glyma06g30860.1<br>Glyma04g06780.1 | UniRef90_Q6S348<br>UniRef90_Q6S350<br>UniRef90_A2WV32<br>UniRef90_Q6S350<br>UniRef90_A2Z1C8<br>UniRef90_A2Z1C8                    |
| Glyco hydro19  | Chitinase class I                            | 1CW         | at1g05850                                                     | Bradi4g34040                                                 | <a href="#">AK369795.1</a>                                                                                                 | gb ACJ84914.1                                                            | gb EEF02193.1 <br>gb EEE99404.1                                                                                | LOC_Os09g32080.2                                                             | ACU18968.1                                                                                  | UniRef90_A2Z2P0                                                                                                                   |
|                |                                              | 2CW         | at3g16920                                                     | Bradi4g34040                                                 | np_172076.1                                                                                                                | medtr2g038810.1                                                          | jgilpoptr1_1 723883 <br>estext_genewise1_v1.c_lg_x0543                                                         | .                                                                            | Glyma09g04330.1                                                                             | .                                                                                                                                 |

**Table S2. List of substrates tested in ELISA binding studies with CTL1 and CTL2 and resulting relative absorbance units.**

| Substrate                                                  | Absorbance<br>(relative units) |      |       |      |
|------------------------------------------------------------|--------------------------------|------|-------|------|
|                                                            | CTL1                           |      | CTL2  |      |
|                                                            | Av                             | SE   | Av    | SE   |
| insoluble fraction plant CW (IF_A.t.)                      | 12.58                          | 2.63 | 14.56 | 2.92 |
| 4M KOH fraction plant CW (4MKOH_A.t.)                      | 10.30                          | 2.82 | 13.58 | 3.95 |
| cellulose, fibrous, long (celluloseFL)                     | 4.71                           | 1.30 | 8.43  | 3.97 |
| sigmacell® cellulose type 20 (sigmacell cellulose)         | 6.70                           | 2.21 | 10.01 | 3.80 |
| carboxymethyl cellulose, sodium salt                       | -0.76                          | n.a  | 1.47  | n.a  |
| CM-cellulose                                               | -0.54                          | n.a  | 1.52  | n.a  |
| avicel PH-101(microcrystalline cellulose)                  | -3.53                          | n.a  | -0.70 | n.a  |
| xyloglucan                                                 | 19.09                          | 1.74 | 14.71 | 4.68 |
| isoprimeverose (xyloglucan derived)                        | -0.76                          | n.a  | 0.34  | n.a  |
| chitin from crab shells (chitin_crab)                      | 7.13                           | 1.27 | 10.49 | 3.48 |
| chitosan medium MW (chitosan mMW)                          | 4.84                           | 1.41 | 6.54  | 1.13 |
| chitosan low MW <sup>a</sup>                               | 2.70                           | 1.43 | 8.28  | 5.13 |
| lichenan                                                   | 3.69                           | 0.84 | 4.32  | 1.19 |
| laminarin <sup>a</sup>                                     | 1.54                           | n.a  | 0.36  | n.a  |
| beta-glucan from barley                                    | 2.84                           | n.a  | 1.53  | n.a  |
| xylan from birchwood (xylan birchwood)                     | 0.94                           | n.a  | 0.34  | n.a  |
| xylan (from oat)                                           | 1.70                           | n.a  | 0.60  | n.a  |
| xylan (from larchwood)                                     | 1.15                           | n.a  | 0.14  | n.a  |
| rye arabinoxylan                                           | 1.37                           | n.a  | 0.64  | n.a  |
| pectin esterified from citrus (pectin citrus)              | 2.77                           | n.a  | 0.56  | n.a  |
| pectic galactan (lupin)                                    | 0.60                           | n.a  | 0.05  | n.a  |
| rhamnogalacturonan from soybean (RG soybean)               | 2.16                           | n.a  | 0.43  | n.a  |
| rhamnogalacturonan I from potato                           | 2.46                           | n.a  | 1.66  | n.a  |
| galactan (lupin)                                           | 1.74                           | n.a  | 0.72  | n.a  |
| arabinogalactan protein from <i>A. thaliana</i> (AGP_A.t.) | 0.56                           | n.a  | 0.43  | n.a  |

Relative absorbance units were calculated by the ratio of the (enzyme-blank) absolute measured absorbance at 450 nm and the concentration of protein used (in µg/mL). When a standard error (SE) is given, each value represents the average of a triplicate or a duplicate (<sup>a</sup>) ELISA experiment.

**Table S3. Primers sequences used for analyses**

| Primer name     | Primer sequence                                                     | Orientation | Restriction |
|-----------------|---------------------------------------------------------------------|-------------|-------------|
| SALK_093049_1   | TTTAGACCACCAGCTGCATTC                                               | For         |             |
| SALK_093049_2   | GATGCCTAGGAGGTTTGGAAAG                                              | Rev         |             |
| SALK_055713_1   | CAGCTTCTTCTCGTCCAACAC                                               | For         |             |
| SALK_055713_2   | GTTTCGAAACCGCTATTCTCC                                               | Rev         |             |
| SALK_insert     | CGCTTCTTCCCTTCCTTTCTC                                               |             |             |
| CTL1_GUS1       | CCATAAGCTTAGATTTGCATCCACTACCAC                                      | For         | HindIII     |
| CTL1_GUS2       | CCACCCATGGTTGTCACCATAGCTTACAAC                                      | Rev         | NcoI        |
| CTL1_GFP1       | GTAAGCCATGGTGACAATCAGGAGTGGT                                        | For         | NcoI        |
| CTL1_GFP2       | ATCTCCATGGAGGAAGAGGAAGGTACAG                                        | Rev         | NcoI        |
| CTL1_pCAMBIA1   | TTGAGTCGACGATCGGAGATGGATGCC                                         | For         | SalI        |
| CTL1_pCAMBIA2   | ATAAGGATCCCGAAGAGGAAGAGGAAGGTACAG                                   | Rev         | BamHI       |
| mCherry_CTL1_1  | GGGATCCACCCTGGCAGTAATCGCCATGGTGAG                                   | For         | BamHI       |
| mCherry2_CTL1_2 | ACTAGTACGAATGTTACTTGTACAGCTCGTCCATGC                                | Rev         | SpeI        |
| mCherry_FABD_1  | CGGGTACCGGTAGAAAAAATGGTGAGCAAGGGCGAGGAGG                            | For         | KpnI        |
| mCherry_FABD_2  | GTTGGCGCGCCCTTCTACTTGTACAGCTCGTCCATGCC                              | Rev         | AscI        |
| FABD_1          | GGGGACAAGTTTGTACAAAAAAGCAGGCTCCACCAAGGGATCCTCTTG AAAGAGCTGAATTGGTTC | For         |             |
| FABD_2          | GGGGACCACTTTGTACAAGAAAGCTGGGTATCATGACTCGATGGATGCTTCCTC              | Rev         |             |
| CTL2_PCTL1_1    | GTTATATCATGACAATGGTCACATTG                                          | For         | BspHI       |
| CTL2_PCTL1_2    | TTCACGCGTCAAGAAGAGGAACC                                             | Rev         | MluI        |
| CTL1_pichia1    | GAAAGCACGTGATATGGTGACAATCAGGAGTGG                                   | For         | PmlI        |
| CTL1_pichia2    | TACAGTCTAGAGAAGAGGAAGAGGAAGGTACA                                    | Rev         | XbaI        |
| CTL2_pichia1    | GAAAGCACGTGATATGGTTTCGAAACCGCTA                                     | For         | PmlI        |
| CTL2_pichia2    | TACAGTCTAGAGAAGAGGAACCAGAACTCGG                                     | Rev         | XbaI        |
| CTL1_qRT1       | CCCTCAGCTCACGACATCTTTG                                              | For         |             |
| CTL1_qRT2       | TAGAGGACGTTTCATGGTGCTGC                                             | Rev         |             |
| CTL2_qRT1       | TGCAACAGCGGATTCGATAAC                                               | For         |             |
| CTL2_qRT2       | TGAGGACCAGCTTCTTCTCGTC                                              | Rev         |             |
| GADPH_3end      | TTGGTGACAACAGGTCAAGCA                                               | For         |             |
| GADPH_3end      | AAACTTGTCGCTCAATGCAATC                                              | Rev         |             |
| GADPH_600b      | AGGTGGAAGAGCTGCTTCCTTC                                              | For         |             |
| GADPH_600b      | GCAACACTTCCCAACAGCCT                                                | Rev         |             |
